# Supplementary material for: The Effects of a Peer-Delivered Social Skills Intervention for Adults with Comorbid Down Syndrome and Autism Spectrum Disorder
Source: Springer Nature journal article supplement (doi:10.1007/s10803-017-3437-1), 2017-12-22
Supplement: MOESM1 [file 15329154]

Fidelity checklist for training

Social Skill ________________ Peer Mediator(s) __________________

1. Explanation of the baseline and instructional procedure is provided Y N

2. Show peer-mediator the task analysis Y N

2. Examples and non-examples given Y N

3. Role-playing session Y N

4. Advice for handling challenges given Y N

Instructional Session Visual Schedule/Outline for Peer Mediators

**Requesting More**

**You say: “TIME TO PRACTICE ASKING FOR MORE.”**

1. Teach to turn towards me
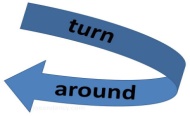


CONGRATULATE!!

2. Teach him/her to ask for more
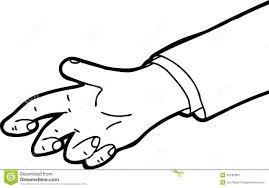


CONGRATULATE!!

3. Teach him/her to take item
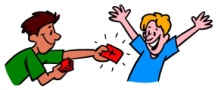


CONGRATULATE!!

4. Says thank you or signs thank you
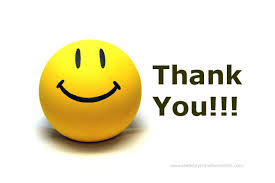


CONGRATULATE!!

5. Teach him/her to use item
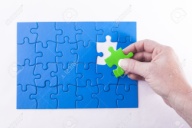


CONGRATULATE!!

**Respond When Invited to Join Activity**

**You say: “You want to play?”**

1. Turn towards me **
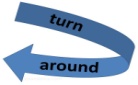
**

CONGRATULATE!!

1. Come to me
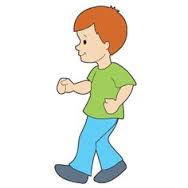


CONGRATULATE!!

1. Says or signs YES or NO
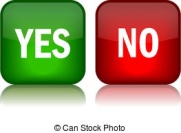


CONGRATULATE!!

1. Sign or say thank you
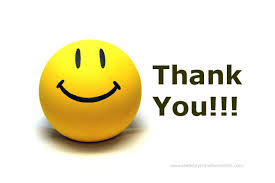


CONGRATULATE!!

1. Play with me (if said yes) or go back to seat (if said no)
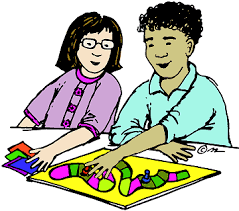
or
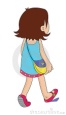


CONGRATULATE!!

**Offer Assistance When Someone Needs Help**

**You say: “I need help.”**

1. Teach to ask if I’m okay
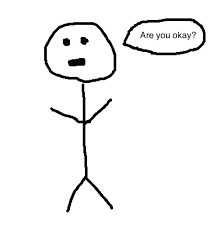


CONGRATULATE!!

2. Teach to wait for 5 seconds

CONGRATULATE!!

**You say: “I need that”**

3. Teach him to give it to you
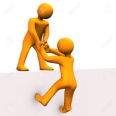


CONGRATULATE!!

4. Teach to say or sign “you’re welcome”
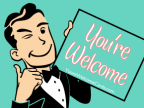


CONGRATULATE!!

5. Teach turn to his activity
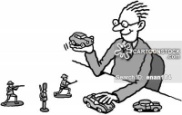


CONGRATULATE!!

**Congratulate Others on a Good Job**

**You say: “I DID IT!”**

1. Teach her to stop the activity
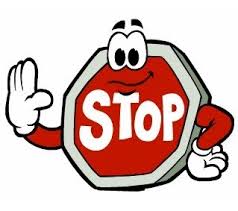


CONGRATULATE!!

2. Teach to turn towards me
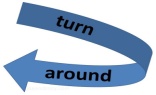


CONGRATULATE!!

3. Teach Jenny to clap for Angela
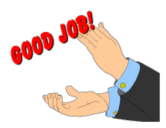


CONGRATULATE!!

4. Teach Jenny to wait for Angela to say thank you (5 sec). **You say: “THANK YOU”**

CONGRATULATE!!

5. Teach her to say you’re welcome or signs you’re welcome
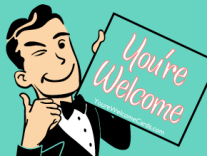


CONGRATULATE!!

Data collection sheets used for student responses, procedure fidelity, and IOA recordings.

Name: _______________ Skill: _Requesting More

Date: _____________ Instructor: ______________Setting: ______________ Time: _________

Materials Ready: _________ Attentional Cue: ________ Task Direction: ________

| *Steps* | *Sd* | *Response Interval (10s)* | *Probe Trial (Student Response)* | *Consequence (None)* | *Sd* | *Instructional Trial (Student Response)* | *Consequence (e.g., Praise)* |
| --- | --- | --- | --- | --- | --- | --- | --- |
| 1. Turns towards me |  |  |  |  |  |  |  |
| 2. Asks for more |  |  |  |  |  |  |  |
| 3. Takes item |  |  |  |  |  |  |  |
| 4. Says thank you or signs thank you |  |  |  |  |  |  |  |
| 5. Uses item |  |  |  |  |  |  |  |
| **Number/% correct** |  |  |  |  |  |  |  |
| **Number/% incorrect** |  |  |  |  |  |  |  |

*Key:* Check (√) indicates correct; (X) sign indicates incorrect or no response.

Name: _______________ Skill: _Respond When Invited to Join Activity

Date: _____________ Instructor: ______________Setting: _________ Time:_________

Materials Ready: _________ Attentional Cue: ________ Task Direction: ________

| *Steps* | *Sd* | *Response Interval (10s)* | *Probe Trial (Student Response)* | *Consequence (None)* | *Sd* | *Instructional Trial (Student Response)* | *Consequence (e.g., Praise)* |
| --- | --- | --- | --- | --- | --- | --- | --- |
| 1. Turns towards me |  |  |  |  |  |  |  |
| 2. Comes to me |  |  |  |  |  |  |  |
| 3. Responds to invitation like saying “yes” or “no” or shaking head |  |  |  |  |  |  |  |
| 4. Says thank you or signs thank you |  |  |  |  |  |  |  |
| 5. Joins you (said yes) or goes back to seat (said no) |  |  |  |  |  |  |  |
| **Number/% correct** |  |  |  |  |  |  |  |
| **Number/% incorrect** |  |  |  |  |  |  |  |

*Key:* Check (√) indicates correct; (X) sign indicates incorrect or no response.

Name: _______________ Skill: _Offer Assistance When Someone Needs Help

Date: _____________ Instructor: ______________Setting: ________ Time: _________

| *Steps* | *Sd* | *Response Interval (10s)* | *Probe Trial (Student Response)* | *Consequence (None)* | *Sd* | *Instructional Trial (Student Response)* | *Consequence*  *(e.g., Praise)* |
| --- | --- | --- | --- | --- | --- | --- | --- |
| 1. Ask if I’m okay |  |  |  |  |  |  |  |
| 2. Waits for me to say thank you (5 seconds) |  |  |  |  |  |  |  |
| 3. Provide help |  |  |  |  |  |  |  |
| 4. Responds “you’re welcome” to “thank you” |  |  |  |  |  |  |  |
| 5. Returns to previous activity |  |  |  |  |  |  |  |
| **Number/% correct** |  |  |  |  |  |  |  |
| **Number/% incorrect** |  |  |  |  |  |  |  |

Materials Ready: _________ Attentional Cue: ________ Task Direction: ________

*Key:* Check (√) indicates correct; (X) sign indicates incorrect or no response.

Name: _______________ Skill: _Congratulate Others on a Good Job

Date: _____________ Instructor: _____________Setting: _______ Time: _________

Materials Ready: _________ Attentional Cue: ________ Task Direction: ________

| *Steps* | *Sd* | *Response Interval (10s)* | *Probe Trial (Student Response)* | *Consequence (None)* | *Sd* | *Instructional Trial (Student Response)* | *Consequence (e.g., Praise)* |
| --- | --- | --- | --- | --- | --- | --- | --- |
| 1. Stops Activity |  |  |  |  |  |  |  |
| 2. Turns towards me |  |  |  |  |  |  |  |
| 3. Congratulates! |  |  |  |  |  |  |  |
| 4. Waits for me to say thank you (5s) |  |  |  |  |  |  |  |
| 5. Says “you’re welcome” or signs “you’re welcome” |  |  |  |  |  |  |  |
| **Number/% correct** |  |  |  |  |  |  |  |
| **Number/% incorrect** |  |  |  |  |  |  |  |

*Key:* Check (√) indicates correct; (X) sign indicates incorrect or no response.

Peer Mediator visual schedules and collection sheets used for probe sessions.

Name: _______________ Skill: Requesting More

Date: ______ Time:____ Peer-mediator: ________________ Setting: ______________

|  | Step | Circle Yes or No |
| --- | --- | --- |
| 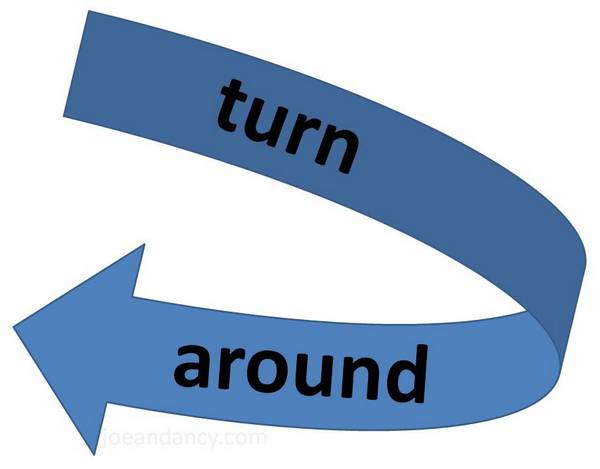 | 1. Turns towards me. | **YES NO** |
| 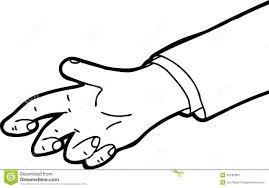 | 2. Asks for more. | **YES NO** |
| 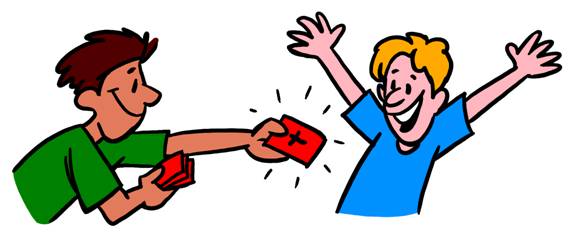 | 3. Takes item. | **YES NO** |
| 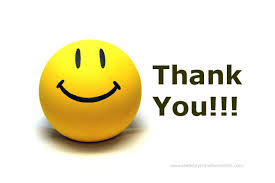 | 4. Says thank you or signs thank you. | **YES NO** |
| 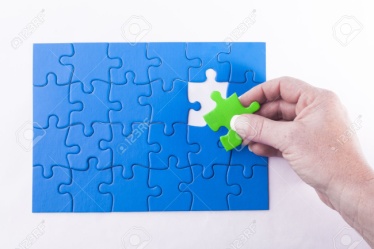 | 5. Uses item. | **YES NO** |

Name: _______________ Skill: Respond When Invited to Join Activity

Date: ______ Time:____ Peer-mediator: ________________ Setting: ______________

|  | Step | Circle Yes or No |
| --- | --- | --- |
| 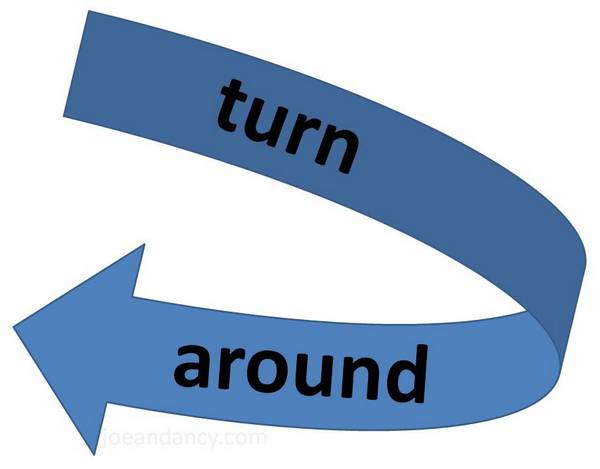 | 1. Turns towards me. | **YES NO** |
| 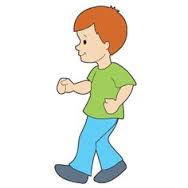 | 2. Comes to me. | **YES NO** |
| 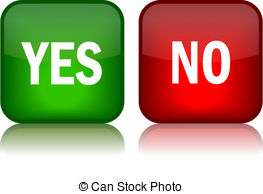 | 3. Responds to invitation like saying “yes” or “no” or shaking head. | **YES NO** |
| 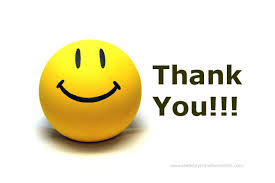 | 4. Says thank you or signs thank you. | **YES NO** |
| 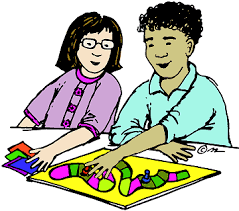OR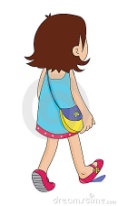 | 5. Joins you (said yes) or goes back to seat (said no). | **YES NO** |

Name: _______________ Skill: Offer Assistance When Someone Needs Help

Date: ______ Time:____ Peer-mediator: ________________ Setting: ______________

|  | Step | Circle Yes or No |
| --- | --- | --- |
| 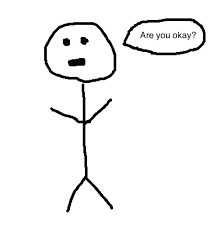 | 1. Ask if I’m okay. | **YES NO** |
| 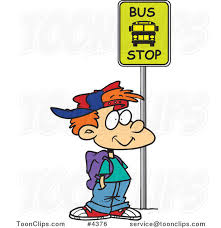 | 2. Waits for me to say thank you (5 seconds). | **YES NO** |
| 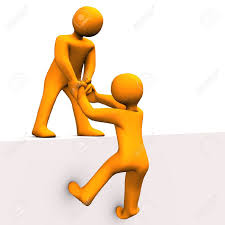 | 3. Provide help. | **YES NO** |
| 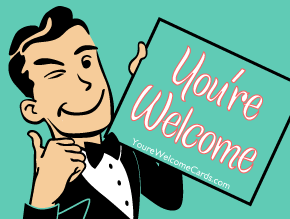 | 4. Respond “you’re welcome” to “thank you” | **YES NO** |
| 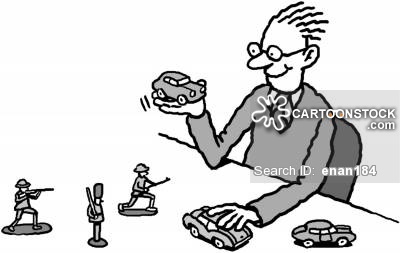 | 5. Return to previous activity. | **YES NO** |

Name: _______________ Skill: Congratulate Others on a Good Job

Date: ______ Time:____ Peer-mediator: ________________ Setting: ______________

|  | Step | Circle Yes or No |
| --- | --- | --- |
| 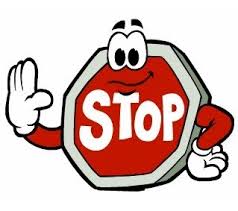 | 1. Stops activity. | **YES NO** |
| 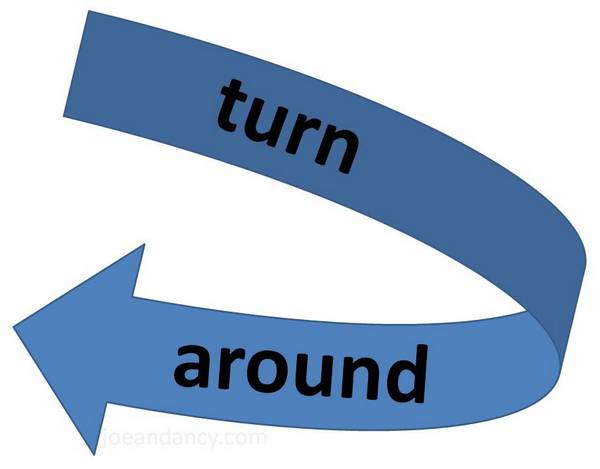 | 2. Turns towards me. | **YES NO** |
| 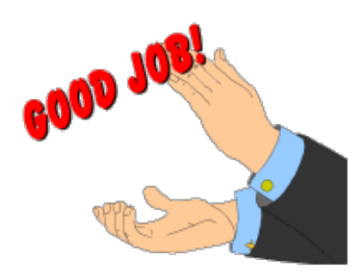 | 3. Congratulates! | **YES NO** |
| 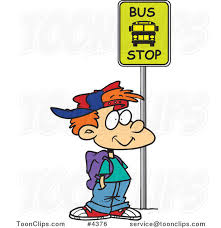 | 4. Waits for me to say thank you (5 seconds) | **YES NO** |
| 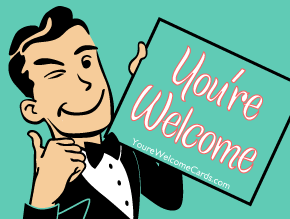 | 5. Says you’re welcome or signs you’re welcome. | **YES NO** |

Instructional Procedures

**Respond When Invited to Join Activity**

**Behavioral Objective**

When invited by the peer mediator, Student will perform the steps of the task analysis for responding to an invitation with 100% accuracy for 3 probe trials. The task analysis will consist of the following steps:

1. Turns towards me

2. Move to area being invited

3. Respond to invitation (e.g., “yes” or “no”)

4. Indicates thank you verbally or non-verbally

5. Join in with activity or go back to previous area

**Instructional Context**

Three times a day (Monday-Friday), Student’s peer mediator will work with him/her to systematically teach responding to an invitation.

**Instructional Materials**

The peer mediator will need an activity or materials that the student enjoys to start the session as well as reinforcement materials, if applicable.

**Instructional Procedures**

Each instructional trial will proceed as follows.

***Attentional Cue:*** The peer mediator will give the general attention cue of stating Student’s name to get attention before the trial starts.

***Natural Occurring Event:*** When teaching social skills, a task direction is often not warranted. For example, in this case teaching responding to an invitation allows the peer mediator’s interaction with the student to be a natural occurring event providing direction.

***Simultaneous Prompting Procedures:*** The peer mediator will deliver the task direction, or in this case discriminative stimulus (e.g., “Do you want to play with me?”), first as a probe session. The peer mediator will say, “What’s next?” as necessary, and wait 10 seconds for Student to initiate each step of the task analysis. If Student fails to initiate a step, the peer mediator will end the trial.

One instructional session using a 0-second time delay interval will occur immediately following the probe session. During this instructional session, the peer mediator immediately will use a controlling prompt to assist Student in performing the correct response.

***Consequence:*** During probe sessions, the peer mediator will not give any feedback on performance. During the instructional sessions, the peer mediator will give the selected reinforcement (e.g., descriptive praise).

**Non-targeted Information**

The peer mediators’ names will be used in the consequent stages of the instructional session with verbal, descriptive praise (“Carol is so proud of you!”).

**Data Collection**

The peer mediator will collect data during the probe sessions that occur once a day. On the data sheet, the peer mediator will circle YES for a correct response or a NO for incorrect response. The researcher will also collect data during probe and instructional sessions to be used for Student participant progress monitoring, procedural reliability, and IOA.

**Maintenance**

Once Student has met the criterion of 100% correct responses for 1 probe trial, reinforcement will be thinned to the end of the successfully completed task (fixed ratio of 5, or FR5). Student response to an invitation skill will continue to be monitored for the remainder of the sessions following the successful completion of each social skill and in a final maintenance probe one week following the final generalization probe.

**Generalization**

The peer mediators will facilitate generalization by having Students perform sessions in different settings and with different materials. Once Student has mastered all social skill tasks, a probe session in his/her residence hall and another probe session with a different peer mediator will be conducted.

**Behavior Management**

The peer mediator and researcher will periodically praise Student for how hard he/she is working (e.g., “You are really working hard. Your correspondent will be so proud!”)

**Congratulate Others on a Good Job**

**Behavioral Objective**

When hearing the peer mediator say he/she did a good job, Student will perform the steps of the task analysis for responding to the comment with 100% accuracy for 3 probe trials. The task analysis will consist of the following steps:

1. Stops activity

2. Turns towards me

3. Indicates a non-verbal (“claps hands”) congratulations

4. Waits approximately 5 seconds for my response (e.g., thank you)

5. Returns to activity

**Instructional Context**

Three times a day (Monday-Friday), Student’s peer mediator will work with him/her to systematically teach congratulating others on a good job.

**Instructional Materials**

The peer mediator will need two activities or sets of materials that the student enjoys to start the session as well as reinforcement materials, if applicable.

**Instructional Procedures**

Each instructional trial will proceed as follows.

***Attentional Cue:*** The peer mediator will give the general attention cue of stating Student’s name to get attention before the trial starts.

***Natural Occurring Event:*** When teaching social skills, a task direction is often not warranted. For example, in this case, teaching how to congratulate others allows the peer mediator’s interaction with the student to be a natural occurring event providing direction.

***Simultaneous Prompting Procedure:*** The peer mediator will deliver the task direction, or in this case discriminative stimulus (e.g., “I did it!” or “I did a good job!”) first as a probe session. The peer mediator will say, “What’s next?” and appropriate statements (e.g., “thank you”) as necessary and wait 10 seconds for Student to initiate each step of the task analysis. If Student fails to initiate a step, the peer mediator will end the trial.

One instructional session using a 0-second time delay interval will occur immediately following the probe. During this instructional session, the peer mediator immediately will use a controlling prompt to assist Student in performing the correct response.

***Consequence:*** During probe sessions, the peer mediator will not give any feedback on performance. During the instructional sessions, the peer mediator will give the selected reinforcement (e.g., descriptive praise).

**Non-targeted Information**

The peer mediators’ names will be used in the consequent stages of the instructional session with verbal, descriptive praise (“Carol is so proud of you!”).

**Data Collection**

The peer mediator will collect data during the probe sessions that occur once a day. On the data sheet, the peer mediator will circle YES for a correct response or a NO for incorrect response. The researcher will also collect data during probe and instructional sessions to be used for Student participant progress monitoring, procedural reliability, and IOA.

**Maintenance**

Once Student has met the criterion of 100% correct responses for 1 probe trial, reinforcement will be thinned to the end of the successfully completed task (fixed ratio of 5, or FR5). Student congratulating skills will continue to be monitored for the remainder of the sessions following the successful completion of each social skill and in a final maintenance probe one week following the final generalization probe.

**Generalization**

The peer mediators will facilitate generalization by having Students perform sessions in different settings and with different materials. Once Student has mastered all social skill tasks, a probe session in his/her residence hall and another probe session with a different peer mediator will be conducted.

**Behavior Management**

The peer mediator and researcher will periodically praise Student for how hard he/she is working (e.g., “You are really working hard. Your correspondent will be so proud!”)

**Requesting Something or Requesting More**

**Behavioral Objective**

When an opportunity to request something is presented by the peer mediator, Student will perform the steps of the task analysis for responding to the comment with 100% accuracy for 3 probe trials. The task analysis will consist of the following steps:

1. Turns toward me

2. Asks for more (e.g., puzzle piece) by pointing, verbally asking, or putting hand on object.

3. Takes item from peer mediator

4. Indicates thank you verbally or non-verbally

5. Uses requested item

**Instructional Context**

Three times a day (Monday-Friday), Student’s peer mediator will work with him/her to systematically teach how to appropriately request something.

**Instructional Materials**

The peer mediator will need one activity or set of materials that the student enjoys to start the session as well as reinforcement materials, if applicable.

**Instructional Procedures**

Each instructional trial will proceed as follows.

***Attentional Cue:*** The peer mediator will give the general attention cue of stating Student’s name to get attention before the trial starts.

***Natural Occurring Event:*** When teaching social skills, a task direction is often not warranted. For example, in this case, teaching how to request something may allow the peer mediator’s interaction with the student to be a natural occurring event providing direction.

***Simultaneous Prompting Procedure:*** The peer mediator will deliver the task direction (i.e., “It’s time to practice asking for more”) first as a probe session. The peer mediator will say, “What’s next?” and wait 10 seconds for Student to initiate each step of the task analysis. If Student fails to initiate a step, the peer mediator will end the trial.

One instructional session using a 0-second time delay interval will occur following the probe. During this instructional session, the peer mediator immediately will use a controlling prompt to assist Student in performing the correct response.

***Consequence:*** During probe sessions, the peer mediator will not give any feedback on performance. During the instructional sessions, the peer mediator will give the selected reinforcement (e.g., descriptive praise).

**Non-targeted Information**

The peer mediators’ names will be used in the consequent stages of the instructional session with verbal, descriptive praise (“Carol is so proud of you!”).

**Data Collection**

The peer mediator will collect data during the probe sessions that occur once a day. On the data sheet, the peer mediator will circle YES for a correct response or a NO for incorrect response. The researcher will also collect data during probe and instructional sessions to be used for Student participant progress monitoring, procedural reliability, and IOA.

**Maintenance**

Once Student has met the criterion of 100% correct responses for 1 probe trial, reinforcement will be thinned to the end of the successfully completed task (fixed ratio of 5, or FR5). Student requesting skills will continue to be monitored for the remainder of the sessions following the successful completion of each social skill and in a final maintenance probe one week following the final generalization probe.

**Generalization**

The peer mediators will facilitate generalization by having Students perform sessions in different settings and with different materials. Once Student has mastered all social skill tasks, a probe session in his/her residence hall and another probe session with a different peer mediator will be conducted.

**Behavior Management**

The peer mediator and researcher will periodically praise Student for how hard he/she is working (e.g., “You are really working hard. Your correspondent will be so proud!”)

**Offer to Assist When Someone Needs Help**

**Behavioral Objective**

When an opportunity to assist the peer mediator is presented, Student will perform the steps of the task analysis for responding to the comment with 100% accuracy for 3 probe trials. The task analysis will consist of the following steps:

1. Asking if the peer mediator is okay

2. Waiting approximately five seconds for response

3. Provide needed assistance

4. Respond “your welcome” to “thank you”

5. Return to previous activity

**Instructional Context**

Three times a day (Monday-Friday), Student’s peer mediator will work with him/her to systematically teach how to offer assistance when someone needs help.

**Instructional Materials**

The peer mediator will need one activity or set of materials that the student enjoys to start the session as well as reinforcement materials, if applicable.

**Instructional Procedures**

Each instructional trial will proceed as follows.

***Attentional Cue:*** The peer mediator will give the general attention cue of stating Student’s name to get attention before the trial starts.

***Natural Occurring Event:*** When teaching social skills, a task direction is often not warranted. For example, in this case, teaching how to help others allows the peer mediator’s interaction with the student to be a natural occurring event providing direction.

***Simultaneous Prompting Procedure:*** The peer mediator will deliver the task direction, or in this case discriminative stimulus (e.g., “I need help!”), first as the probe session. The peer mediator will say, “What’s next” or provide appropriate statements (e.g., “I need that”) and wait 10 seconds for Student to initiate each step of the task analysis. If Student fails to initiate a step, the peer-mediator will end the trial.

One instructional session using a 0-second time delay interval will occur following the probe. During this instructional session, the peer mediator immediately will use a controlling prompt to assist Student in performing the correct response.

***Consequence:*** During probe sessions, the peer mediator will not give any feedback on performance. During the instructional sessions, the peer mediator will give the selected reinforcement (e.g., descriptive praise).

**Non-targeted Information**

The peer mediators’ names will be used in the consequent stages of the instructional session with verbal, descriptive praise (“Carol is so proud of you!”).

**Data Collection**

The peer mediator will collect data during the probe sessions that occur once a day. On the data sheet, the peer mediator will circle YES for a correct response or a NO for incorrect response. The researcher will also collect data during probe and instructional sessions to be used for Student participant progress monitoring, procedural reliability, and IOA.

**Maintenance**

Once Student has met the criterion of 100% correct responses for 1 probe trial, reinforcement will be thinned to the end of the successfully completed task (fixed ratio of 5, or FR5). Student helping skills will continue to be monitored for the remainder of the sessions following the successful completion of each social skill and in a final maintenance probe one week following the final generalization probe.

**Generalization**

The peer mediators will facilitate generalization by having Students perform sessions in different settings and with different materials. Once Student has mastered all social skill tasks, a probe session in his/her residence hall and another probe session with a different peer mediator will be conducted.

**Behavior Management**

The peer mediator and researcher will periodically praise Student for how hard he/she is working (e.g., “You are really working hard. Your correspondent will be so proud!”)
